# Supplementary material for: Effect of He Plasma Exposure on Recrystallization Behaviour and Mechanical Properties of Exposed W Surfaces—An EBSD and Nanoindentation Study
Source: MDPI journal article supplement (doi:10.3390/met13091582), 2023-09-11
Supplement: s1 [file s1]

Archive with 3 entries (3 files):
- Figure_captions_supplementary_figs.pdf
- Sup_fig_1_low_index_fract_grains.tif
- Sup_fig_2_AFM_pile-up_measure.tif
