# Supplementary material for: Effect of He Plasma Exposure on Recrystallization Behaviour and Mechanical Properties of Exposed W Surfaces—An EBSD and Nanoindentation Study
Source: MDPI journal article supplement (doi:10.3390/met13091582), 2023-09-11
Supplement: s1 [file s1 › Figure_captions_supplementary_figs.pdf]

## Effect of He plasma exposure on recrystallization behaviour and mechanical properties of exposed W surfaces – an EBSD and nanoindentation study

### Figure captions

**Supplementary Figure S1.** (a) The major grains with low indexing fraction highlighted, along with their crystal orientations, (b) Corresponding pole figures, (c) inverse pole figure showing the surface normal with respect to the basic crystallographic triangle, showing that the preferred orientation varies from about  $\langle 112 \rangle$  to  $\sim \langle 123 \rangle$  in the middle of the triangle, and none of the grains oriented along the low index poles  $\langle 100 \rangle$ ,  $\langle 110 \rangle$  and  $\langle 111 \rangle$

**Supplementary Figure S2.** AFM image showing measurement of the height differences around a nanoindent
