# Supplementary figures and images for: Effect of He Plasma Exposure on Recrystallization Behaviour and Mechanical Properties of Exposed W Surfaces—An EBSD and Nanoindentation Study
Source: MDPI journal article supplement (doi:10.3390/met13091582), 2023-09-11

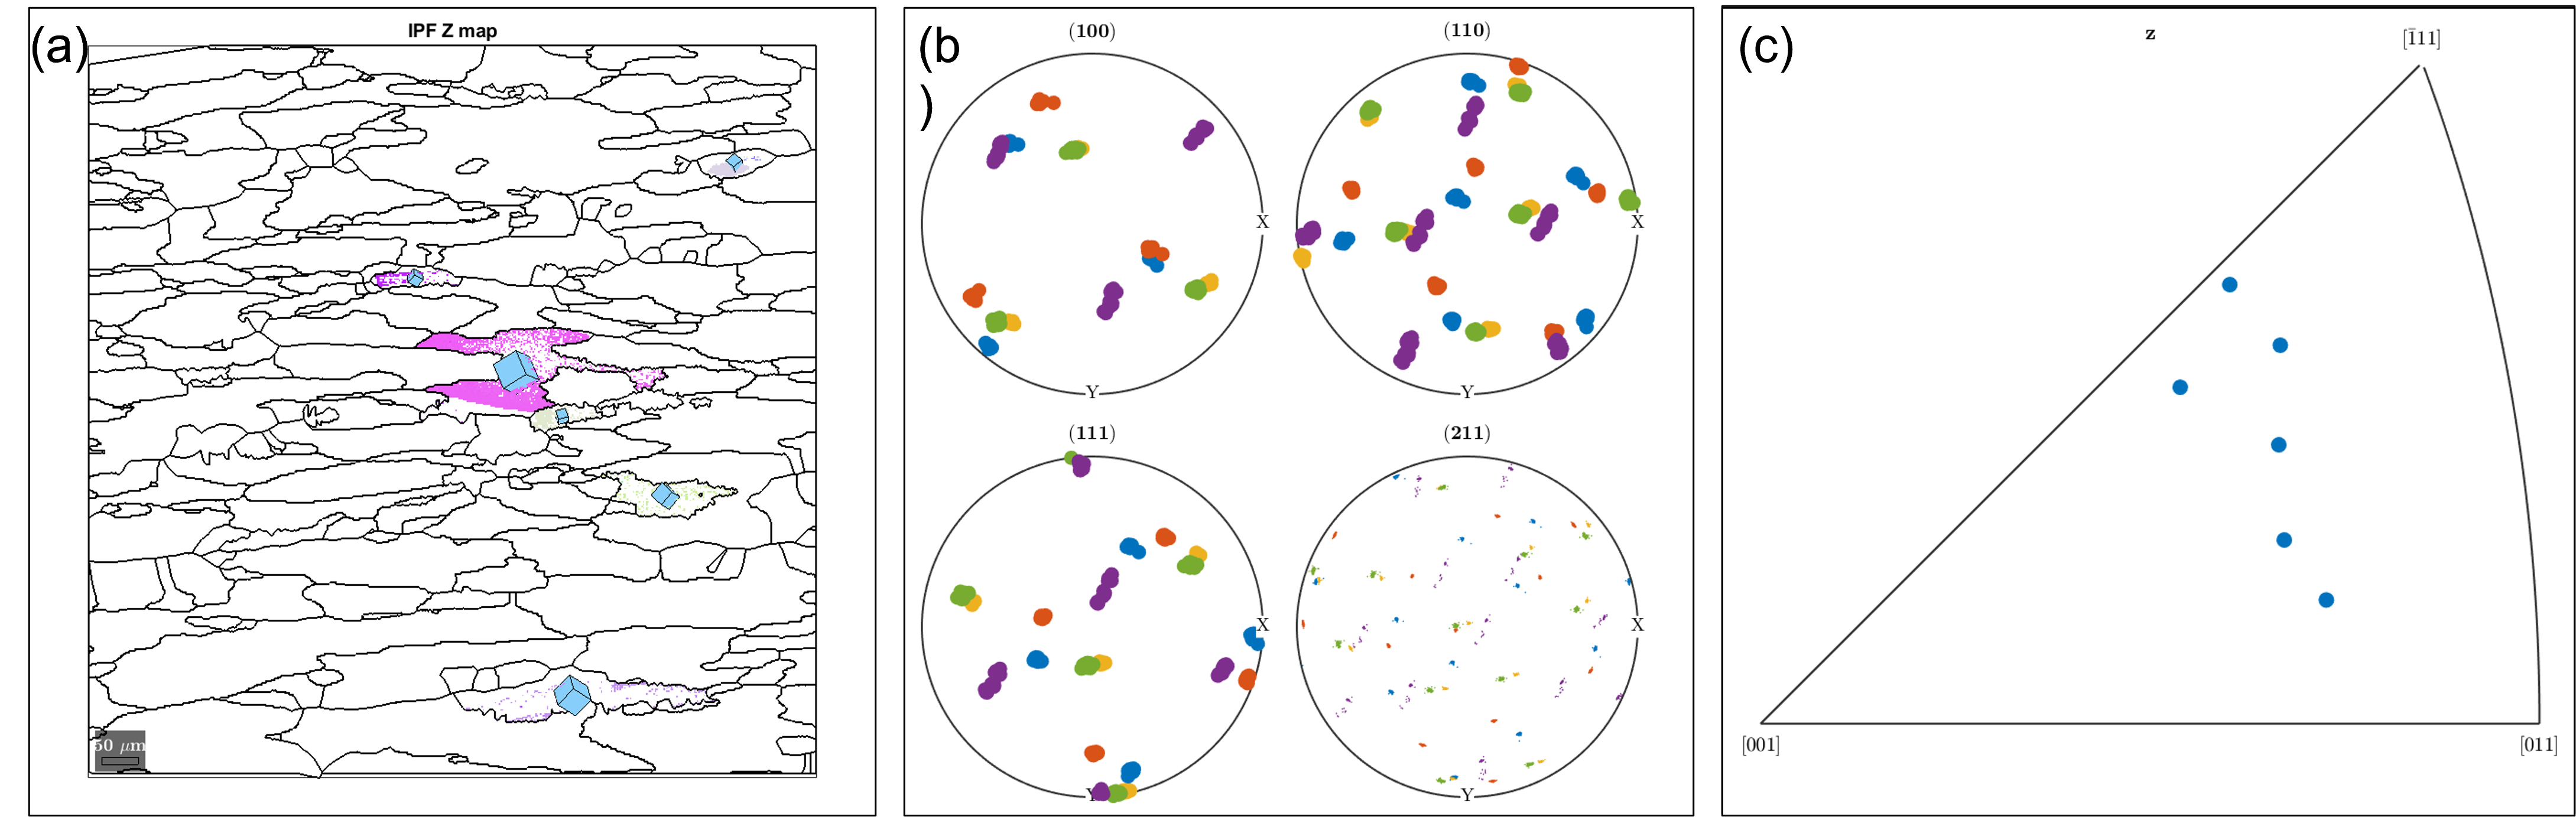

Supplement: s1 [file s1 › Sup_fig_1_low_index_fract_grains.tif]

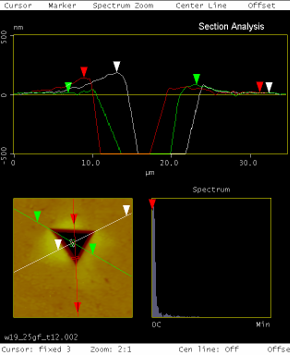

Supplement: s1 [file s1 › Sup_fig_2_AFM_pile-up_measure.tif]
